# Supplementary material for: FTO-mediated m6A demethylation regulates GnRH expression in the hypothalamus via the PLCβ3/Ca2+/CAMK signalling pathway
Source: PubMed Central journal article supplement (PMC10739951; doi:10.1038/s42003-023-05677-2), 2023-12-21
Supplement: 42003_2023_5677_MOESM1_ESM.pdf [file 42003_2023_5677_MOESM1_ESM.pdf]

1 **Supplementary Information**

2 Zang et al.

3 FTO-mediated m<sup>6</sup>A demethylation regulates GnRH expression in the hypothalamus  
4 via the PLCβ3/Ca<sup>2+</sup>/CAMK signalling pathway

5

6 **Supplementary Fig. 1**

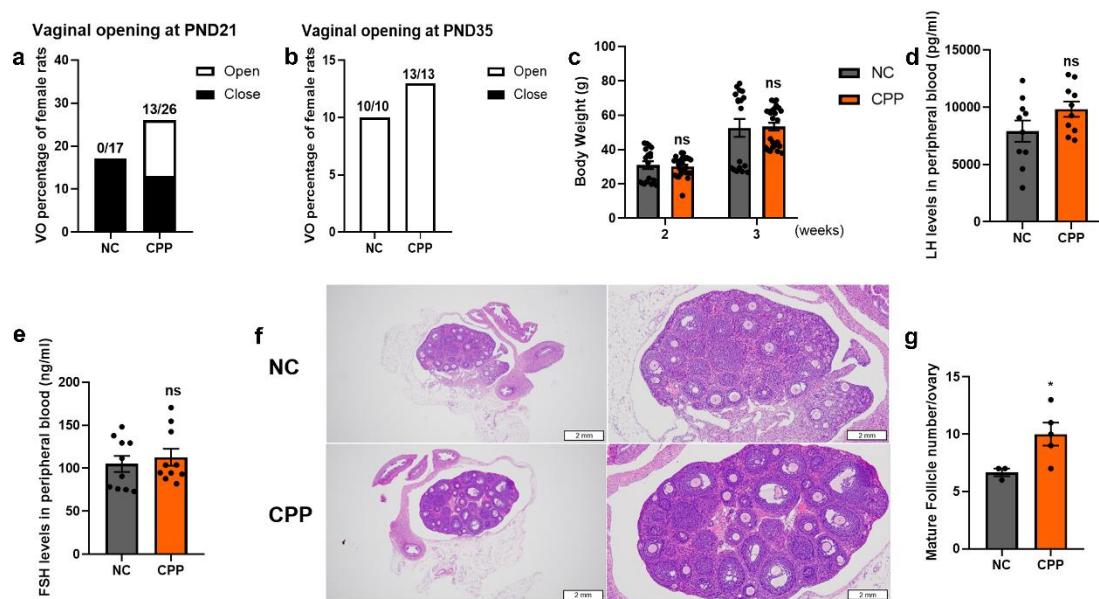

7

8 **Supplementary Fig. 1. A female rat model of precocious puberty was successfully**

9 **constructed. a, b** VO percentage at 3 weeks (**a**) and 5 weeks (**b**) in NC and CPP

10 female rats. **c** Body weights of female rats in the NC and CPP groups at 2 weeks and 3

11 weeks (n=18). **d, e** LH and FSH abundance in serum from 3-week-old female rats as

12 determined by ELISA (NC, CPP; n = 10). **f** Ovary size and follicle morphology in

13 female rats in the NC (n=3) and CPP (n=5) groups at 3 weeks with H&E staining.

14 Bars, 2 mm. **g** Numbers of mature follicles in the ovaries of NC and CPP female rats

15 at 3 weeks. The bars represent the means  $\pm$  SEMs. \* $P < 0.05$ , \*\* $P < 0.01$ , and \*\*\* $P <$   
16 0.001 versus the NC group by Student's t test.

17

18 **Supplementary Fig. 2**

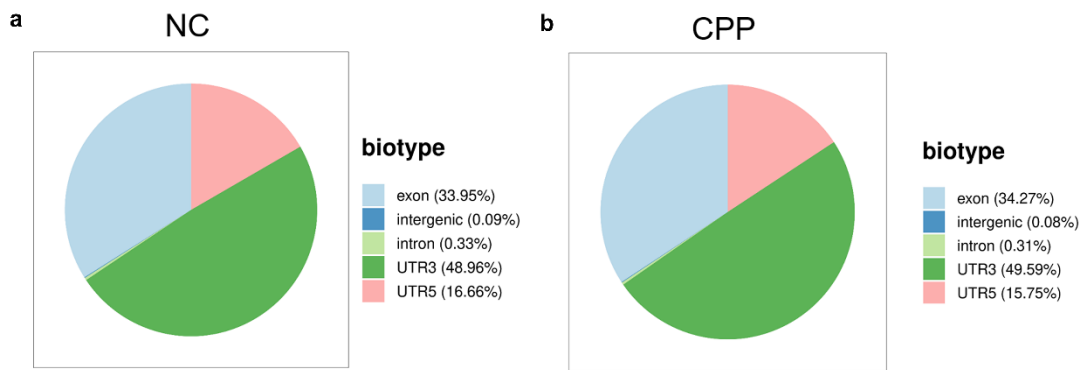

19

20 **Supplementary Fig. 2 Distribution of m<sup>6</sup>A peaks in the NC and CPP female rats.**

21 **a, b** Proportion of m<sup>6</sup>A peak distribution in the exon, intergenic, intron, 3'UTR or  
22 5'UTR across the entire set of mRNA transcripts between the NC (**a**) and CPP (**b**)  
23 female rats.

24

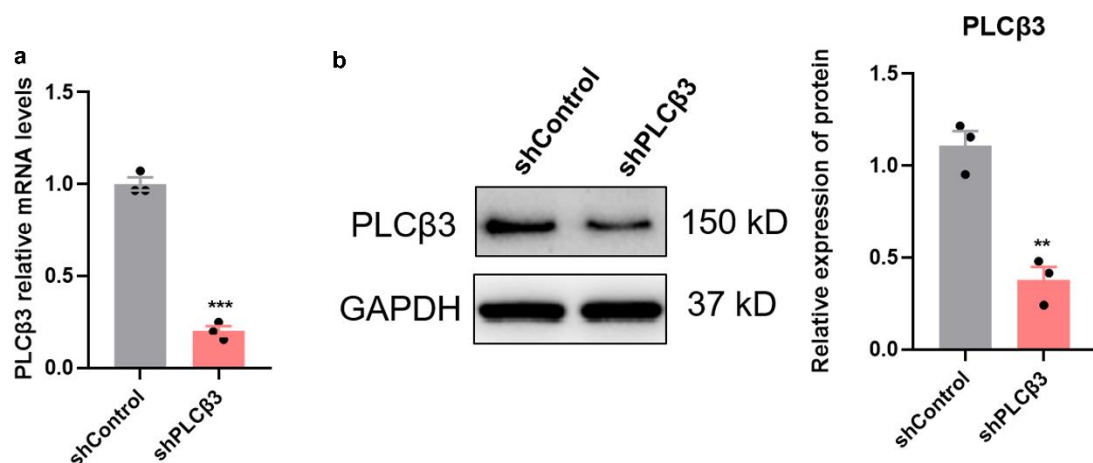

25

26 **Supplementary Fig. 3 A PLCβ3 silencing plasmid was successfully constructed. a**

27 mRNA expression of *PLCβ3* in control and PLCβ3-knockdown cells as determined by

28 qPCR (n=3). **b** PLC $\beta$ 3 protein concentration as determined by western blotting (n=3).

29 The bars represent the means  $\pm$  SEMs. \*\* $P < 0.01$  and \*\*\* $P < 0.001$  versus the sh-

30 control group by Student's t test.

31

32 **Supplementary Fig. 4**

33

34

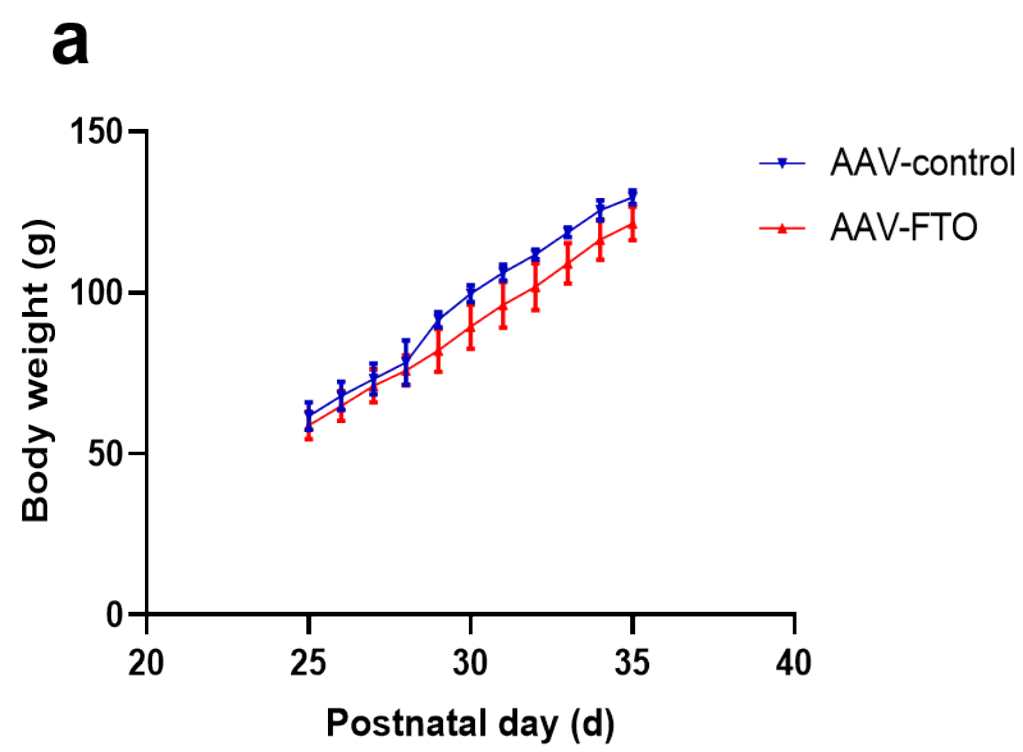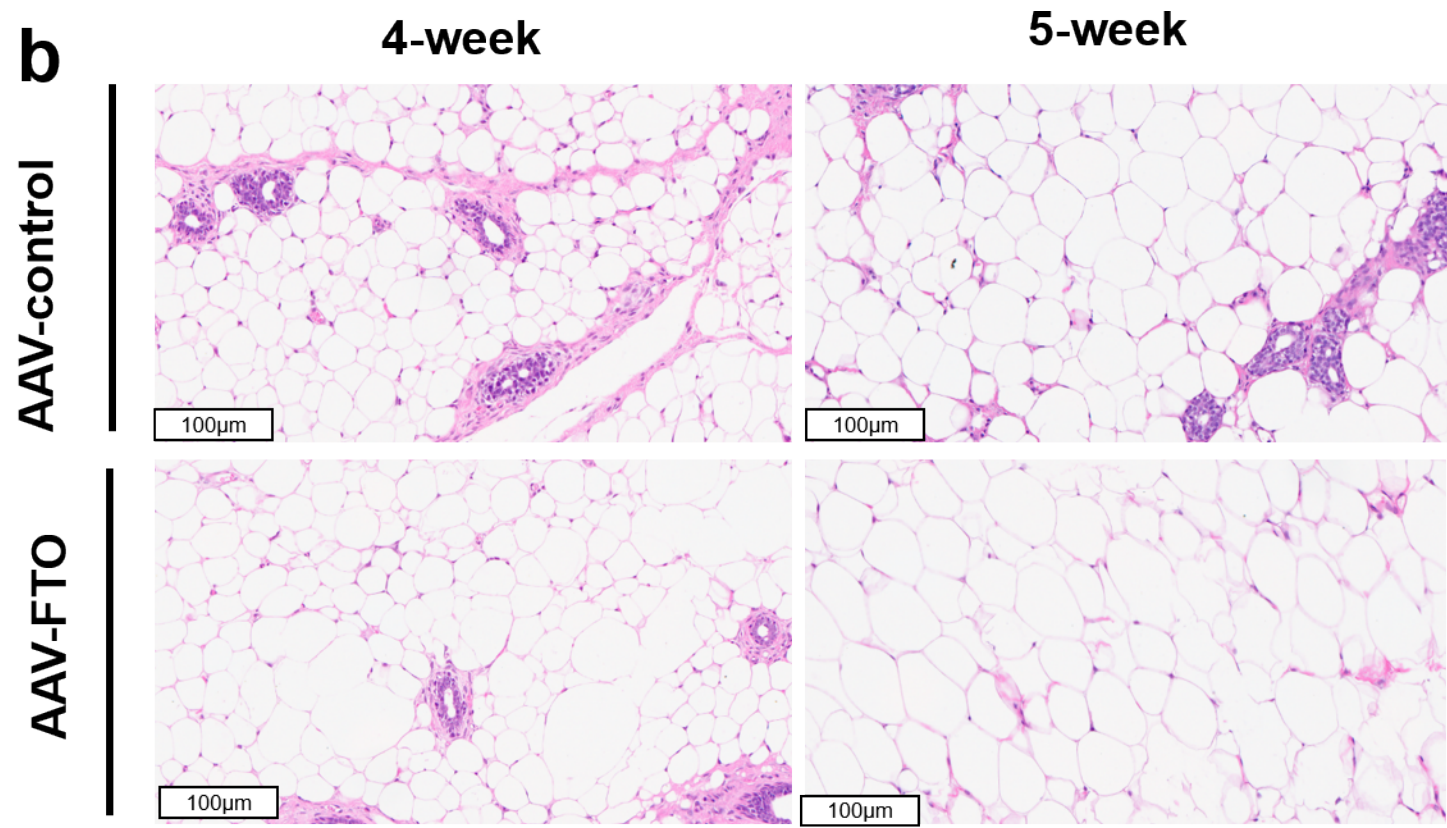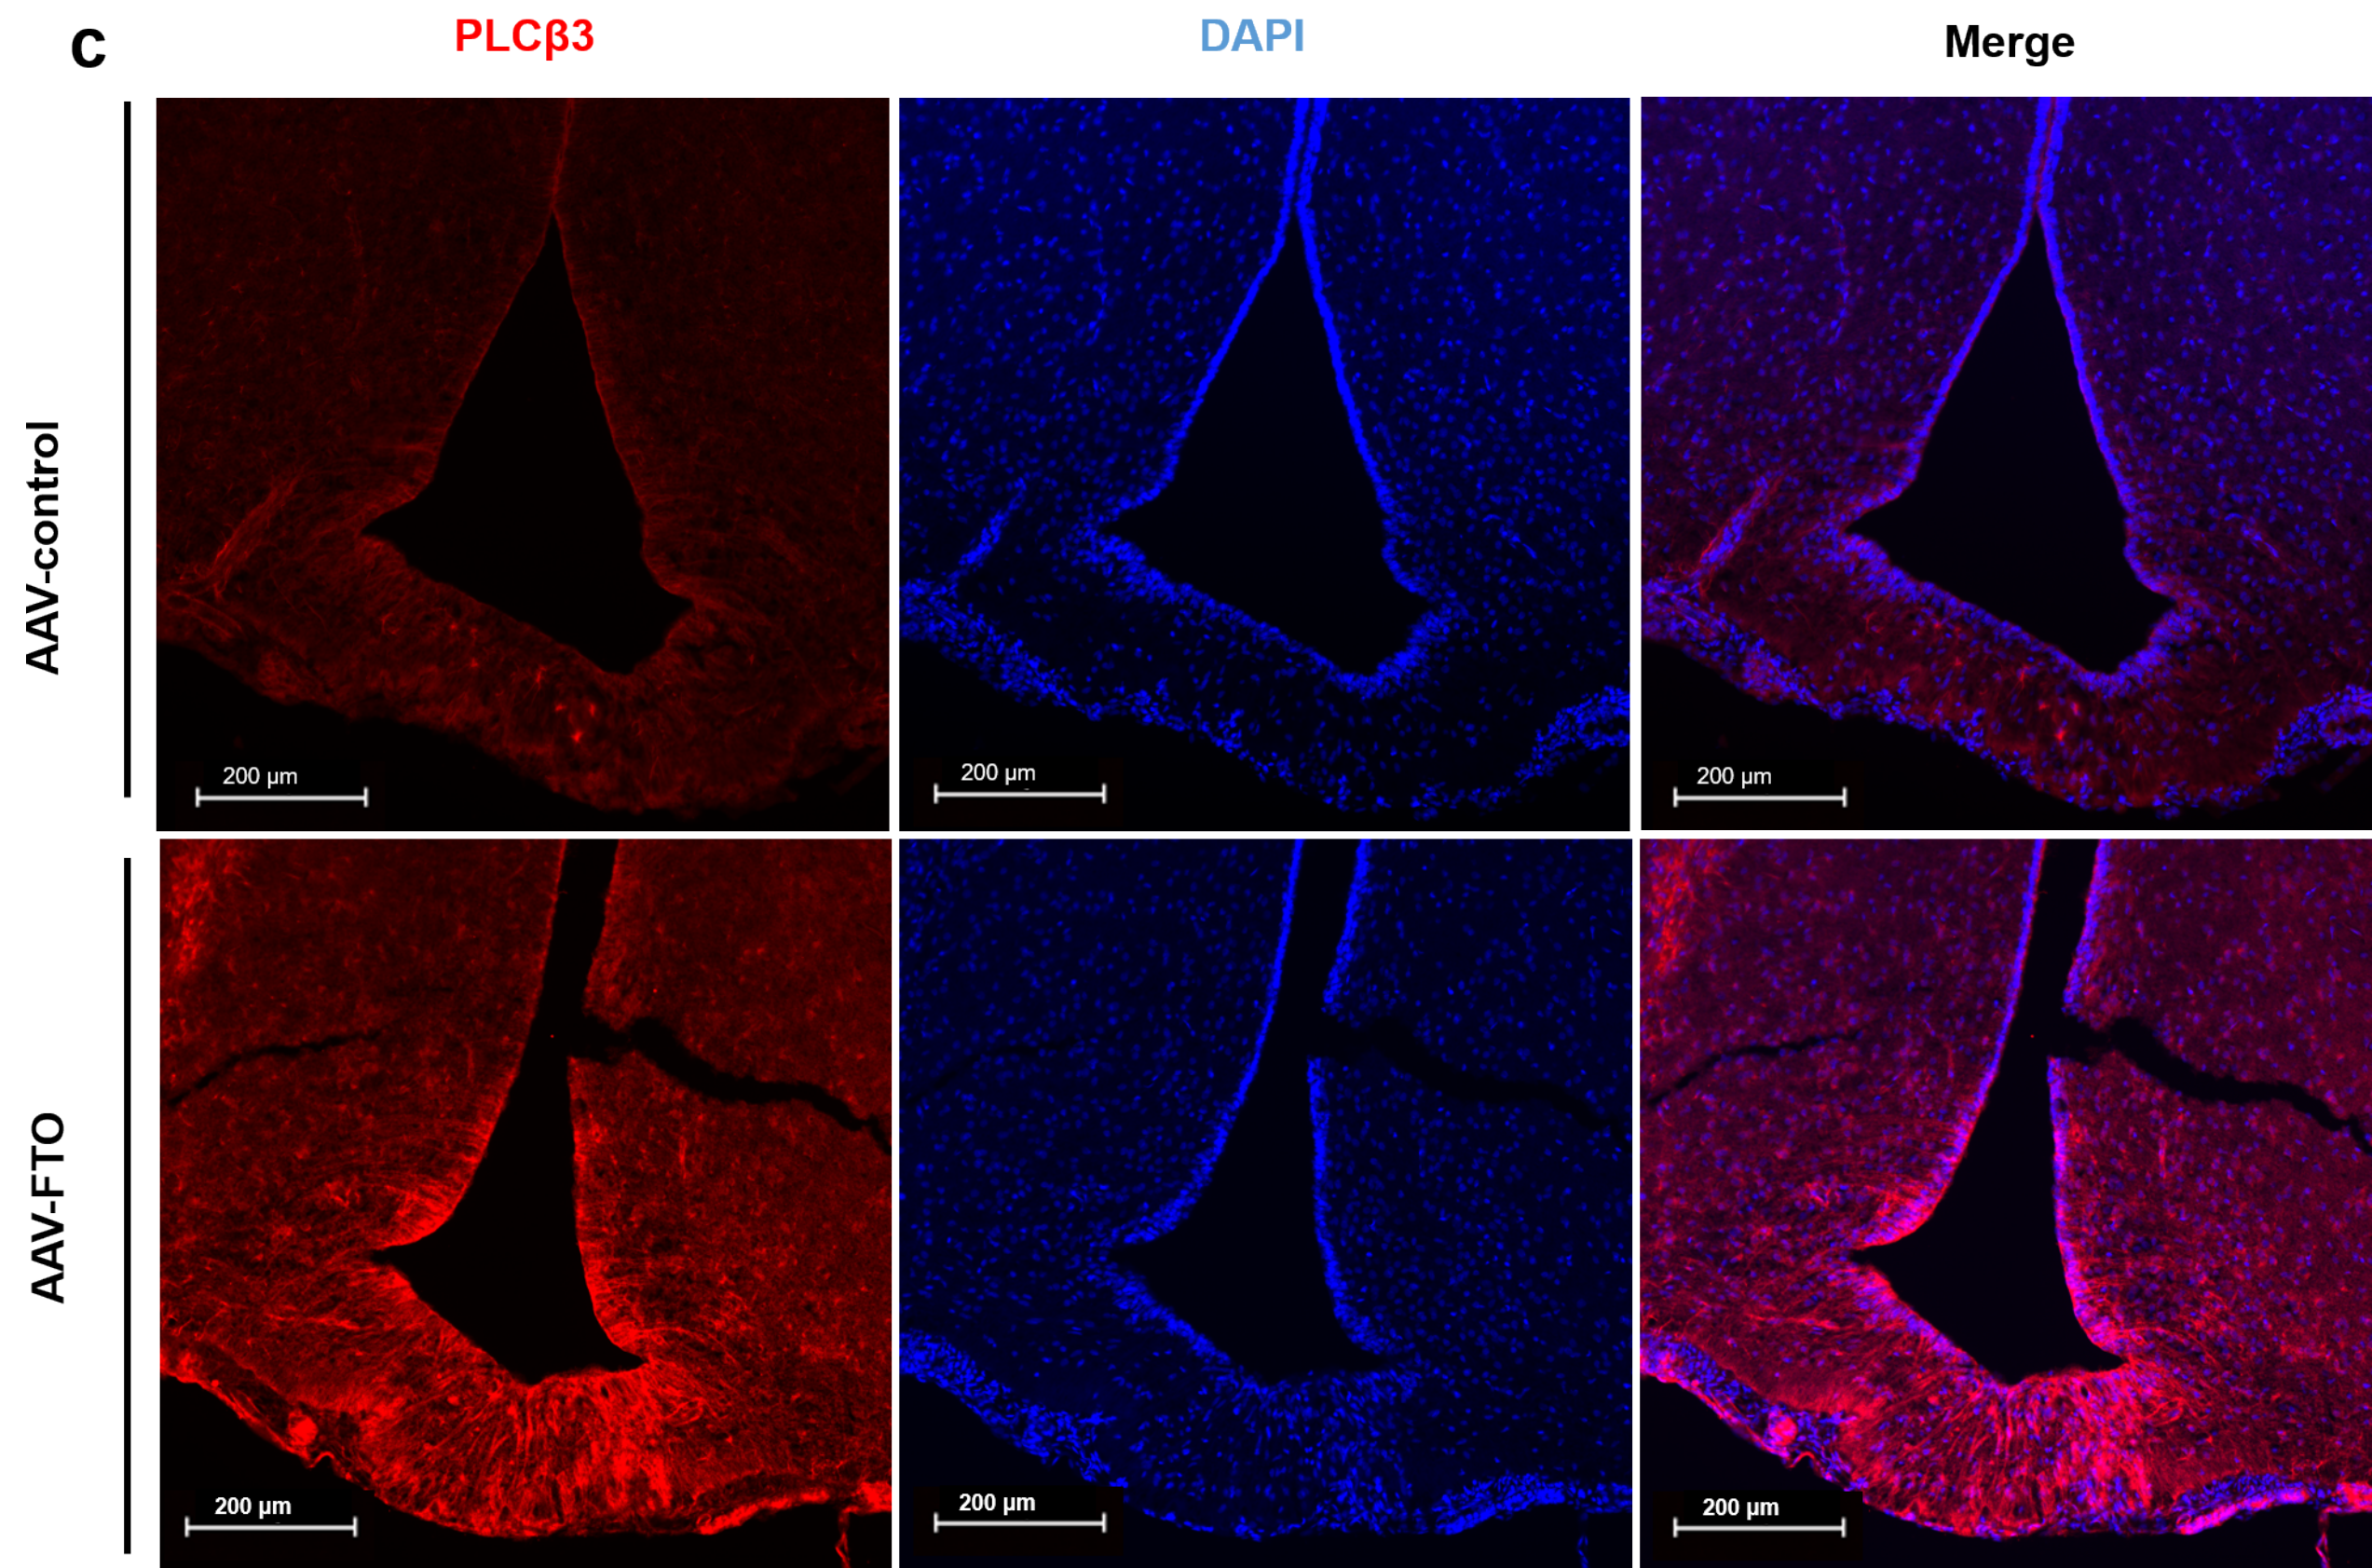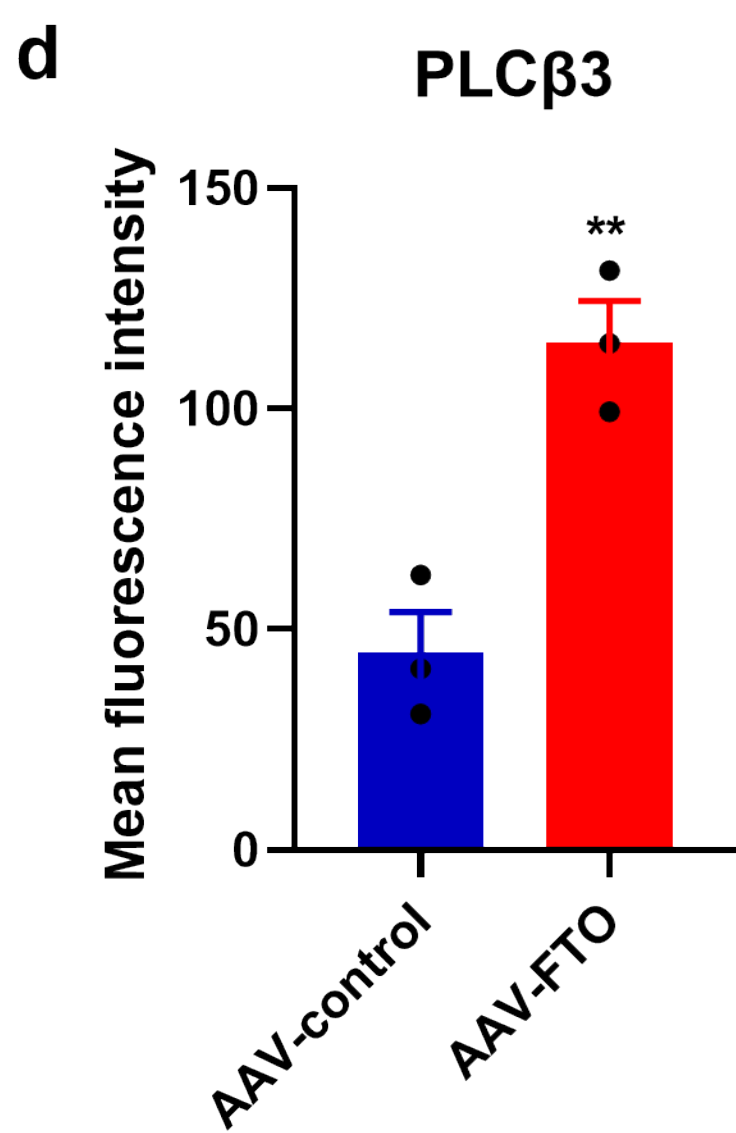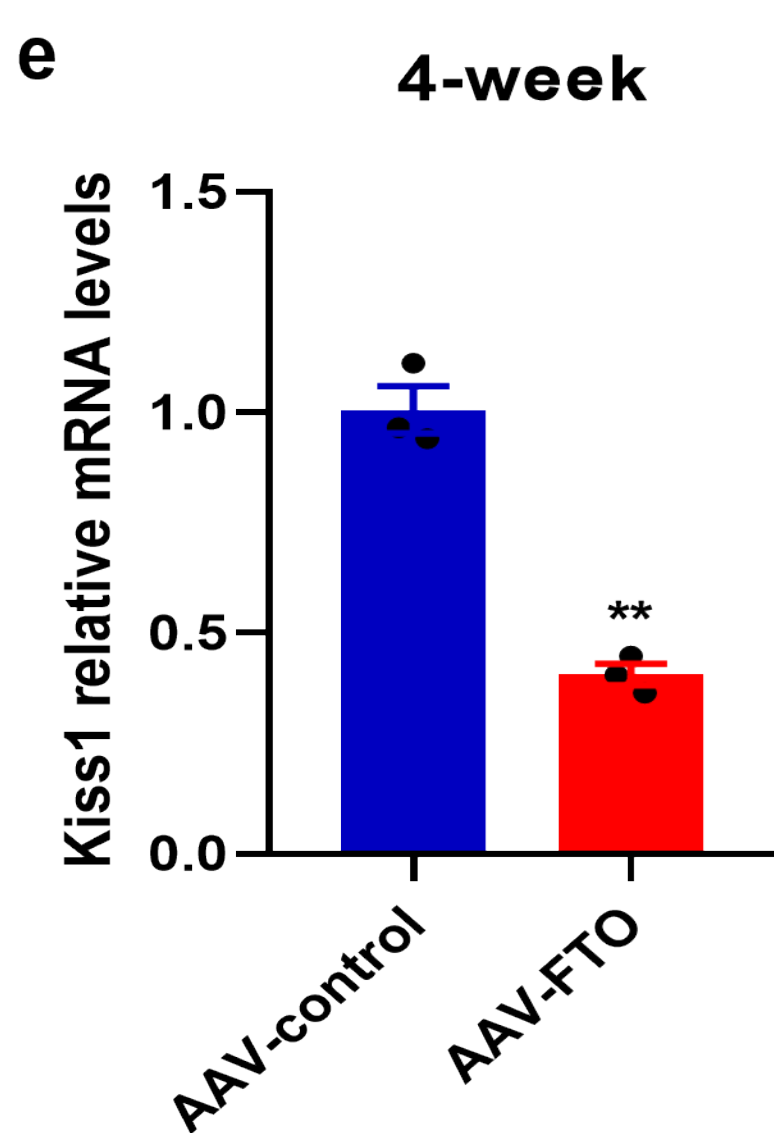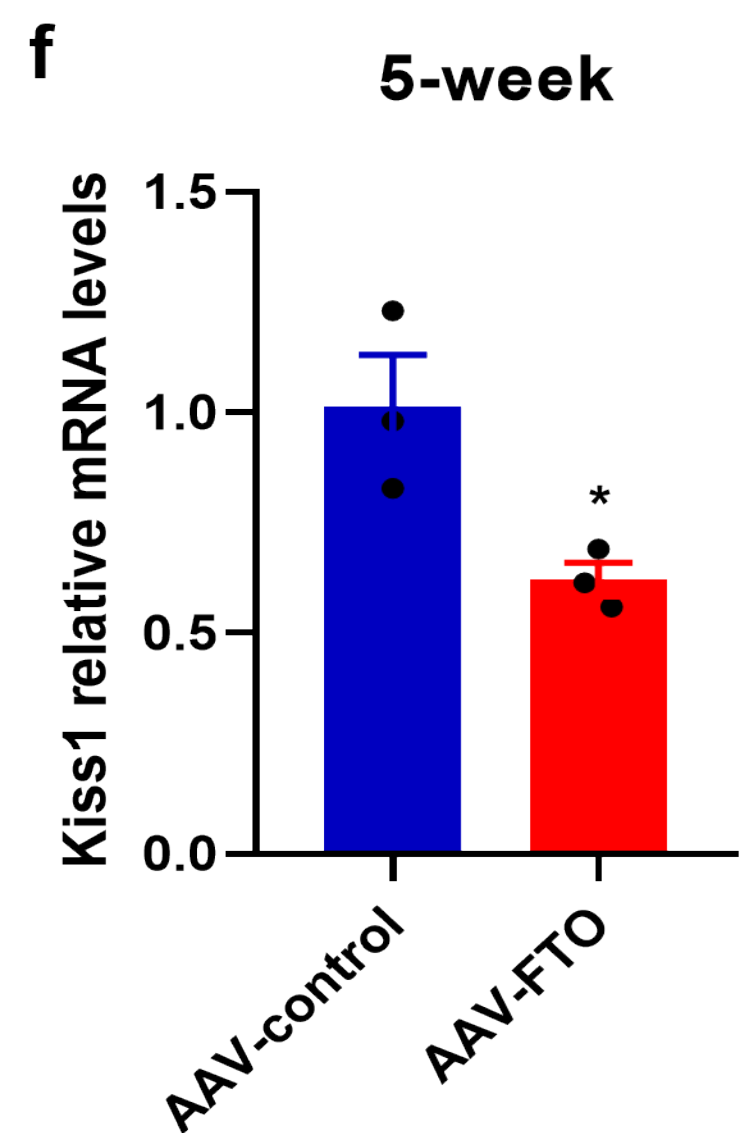

35 **Supplementary Fig. 4 Effects of intra-ARC AAV-FTO and AAV-control**  
36 **administration on female rats at 4 weeks and 5 weeks. Three-week-old female rats**  
37 **were microinjected with AAV-FTO or AAV-control in the ARC. a** Body weights of  
38 female rats receiving AAV transfection beginning at postnatal day 25 (PND25) (n=6).  
39 **b** Pathological assessment of fat by H&E staining in the ARC-infected group at 4 weeks  
40 and 5 weeks (n=6). Scale bars, 100  $\mu$ m. **c** Abundance of PLC $\beta$ 3 (red colour) and DAPI  
41 (blue colour) in the ARC as determined by IF (NC, CPP; n = 3). Scale bars, 200  $\mu$ m. **d**  
42 Mean fluorescence intensity of PLC $\beta$ 3 as calculated by ImageJ software. **e, f** *Kiss1*  
43 mRNA levels detected by qPCR in the ARC in 4-week (**e**) or 5-week (**f**) female rats  
44 receiving AAV-control (n = 3) or AAV-FTO (n = 3). AAV-FTO for the FTO-  
45 overexpression group, AAV-control for the AAV negative control group. The bars  
46 represent the means  $\pm$  SEMs. \**P* < 0.05 and \*\**P* < 0.01 versus the AAV-control group  
47 by Student's t test.

48

49 **Supplementary Table 1. Sequences of qPCR primers.**

| Gene                            | Species | Forward primer (5'-3')  | Reverse primer (5'-3') |
|---------------------------------|---------|-------------------------|------------------------|
| <b>qPCR primers</b>             |         |                         |                        |
| <i><math>\beta</math>-actin</i> | mouse   | AAGATCAAGATCATTGCTCCTCC | GACTCATCGTACTCCTGCTTGC |
| <i>FTO</i>                      | mouse   | GAGCAGCCTACAACGTGACT    | GAAGCTGGACTCGTCCTCAC   |
| <i>GnRH</i>                     | mouse   | TGATCCTCAAACCTGATGGCCG  | CGCAACCCATAGGACCAGTG   |
| <i>CAM</i>                      | mouse   | GGCTGACCAACTGACTGA      | TTACCATCCGCATCTACT     |

---

|                |       |                         |                         |
|----------------|-------|-------------------------|-------------------------|
| <i>PLCβ3</i>   | mouse | CGAGACTCAACGAAGTGCTG    | ACCTCCTCCCCATTGCTTAG    |
| <i>β-actin</i> | rat   | TGCCGCATCCTCTTCCTC      | GGTCTTTACGGATGTCAACG    |
| <i>GnRH</i>    | rat   | CCGCTGTTGTTCTGTTGACTGTG | GGGGTTCTGCCATTTGATCCTC  |
| <i>Kiss1</i>   | rat   | AGCTGCTGCTTCTCCTCTGT    | AGGCTTGCTCTCTGCATACC    |
| <i>FTO</i>     | rat   | GACACTTGGCTTCCTTACCTG   | CTCACCACGTCCCGAAACAA    |
| <i>CAM</i>     | rat   | CGACTTCCCTGAATTCCTGA    | TCTGCTGCACTGATGTAGCC    |
| <i>CAMKII</i>  | rat   | AAGATGTGCGACCCTGGAATG   | TGTAGGCGATGCAGGCTGAC    |
| <i>ALKBH5</i>  | rat   | CGCGGTCATCAACGACTACC    | ATGGGCTTGAAC TGGAACTTG  |
| <i>METTL3</i>  | rat   | CTGGGCACTTGGATTTAAGGAA  | TGAGAGGTGGTGTAGCAACTT   |
| <i>METTL14</i> | rat   | GAGCTGAGAGTGCGGATAGC    | GCAGATGTATCATAGGAAGCCC  |
| <i>FMRI</i>    | rat   | CAATGGCGCTTTCTACAAGGC   | TCTGGTTGCCAGTTGTTTTCA   |
| <i>METTL16</i> | rat   | GACAAACCACCTGACTTCGCA   | TCTGACTGCTTCGGGGTCTT    |
| <i>RBM15</i>   | rat   | CGAGTCCGCTGTGTGAAAC     | TCCCCACGAGAACTGGAGTC    |
| <i>RBMX</i>    | rat   | AGAGACGAATGAGAAAGCCCT   | AGTGACAAAAGCGAATCCTCTTG |
| <i>VIRMA</i>   | rat   | GGTTCGTTTTCCGTGTGTGG    | GCCACTATGGGCTCGTACTC    |
| <i>WTAP</i>    | rat   | GAACCTCTTCCTAAAAAGGTCCG | TTAACTCATCCCGTGCCATAAC  |
| <i>YTHDC1</i>  | rat   | GTCCACATTGCCTGTAAATGAGA | GGAAGCACCCAGTGTATAGGA   |
| <i>YTHDC2</i>  | rat   | GAAGATCGCCGTCAACATCG    | GCTCTTTCCGTACTGGTCAAA   |
| <i>YTHDF1</i>  | rat   | ACAGTTACCCCTCGATGAGTG   | GGTAGTGAGATACGGGATGGGA  |
| <i>YTHDF2</i>  | rat   | GAGCAGAGACCAAAAGGTCAAG  | CTGTGGGCTCAAGTAAGGTTC   |
| <i>YTHDF3</i>  | rat   | GATCAGCCTATGCCATATCTGAC | CCCCTGGTTGACTAAAAACACC  |

**MeRIP-qPCR primers**

*PLCβ3* mouse GTCAGGAACAGCGAGAGAGG CCAGTTCAAAGCTGGGTGTT

peak

50

51 **Supplementary Table 2 The information of antibodies used in this study.**

| <b>Antibodies</b>      | <b>Source</b> | <b>Identifier</b> | <b>Host</b> | <b>Application</b> |
|------------------------|---------------|-------------------|-------------|--------------------|
| GAPDH                  | CST           | #2118             | Rabbit      | WB                 |
| FTO                    | ABclonal      | A1438             | Rabbit      | WB                 |
| FTO                    | Abcam         | Ab92821           | mouse       | IF                 |
| PLCβ3                  | Santa Cruz    | sc-133231         | mouse       | IF                 |
| m6A                    | SYSY          | 202003            | Rabbit      | IF                 |
| PLCβ3                  | CST           | #14247            | Rabbit      | WB                 |
| CAM                    | ABclonal      | A4885             | Rabbit      | WB                 |
| CAMKII                 | CST           | #4436             | Rabbit      | WB                 |
| p-CAMKII               | CST           | #12716            | Rabbit      | WB                 |
| HRP Goat Anti-Rabbit   | ABclonal      | AS014             | Goat        | WB                 |
| IgG (H+L)              |               |                   |             |                    |
| FITC-conjugated donkey | Proteintech   | SA00003-9         | Donkey      | IF                 |
| anti-mouse IgG (H+L)   |               |                   |             |                    |
| CoraLite594-conjugated | Proteintech   | SA00013-8         | Donkey      | IF                 |
| donkey anti-Rabbit IgG |               |                   |             |                    |
| (H+L)                  |               |                   |             |                    |

Alexa Fluor 594- CST #8890 Goat IF  
 conjugated goat anti-  
 mouse IgG(H+L)

---

52

53 **Supplementary Fig. 5**

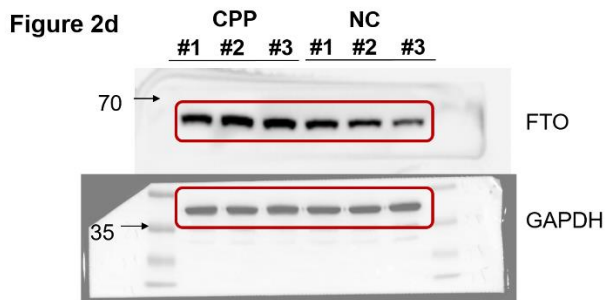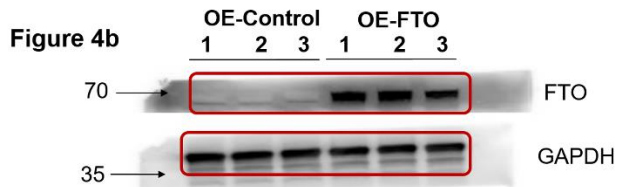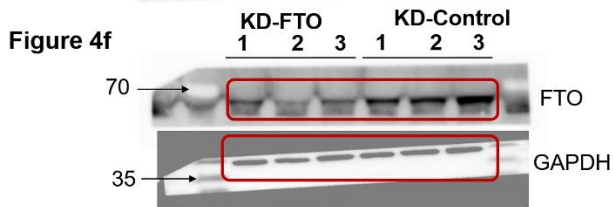

54

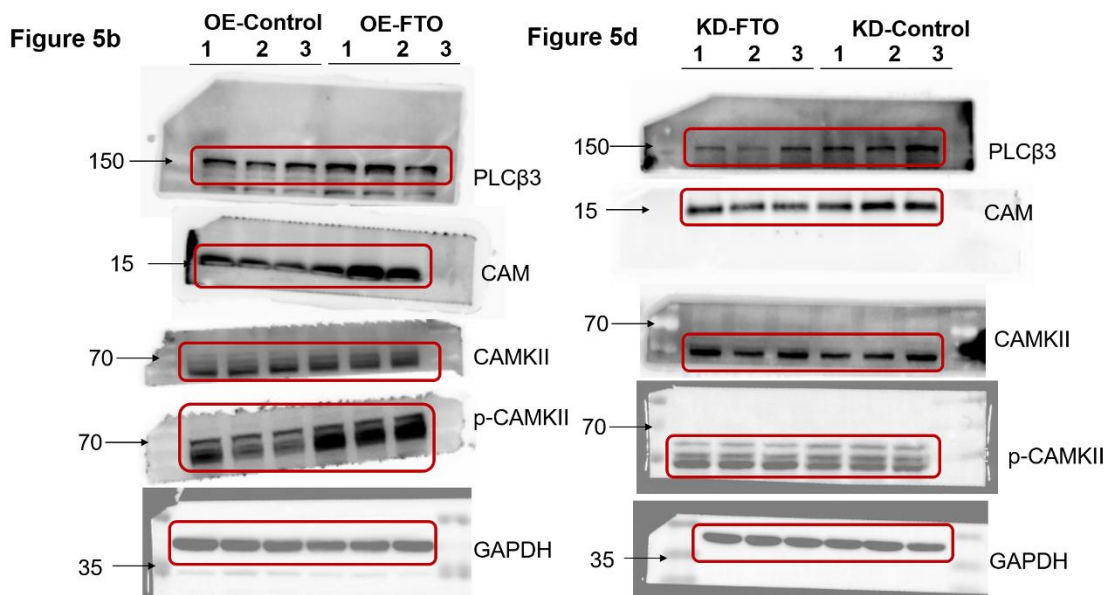

55



Figure 5e

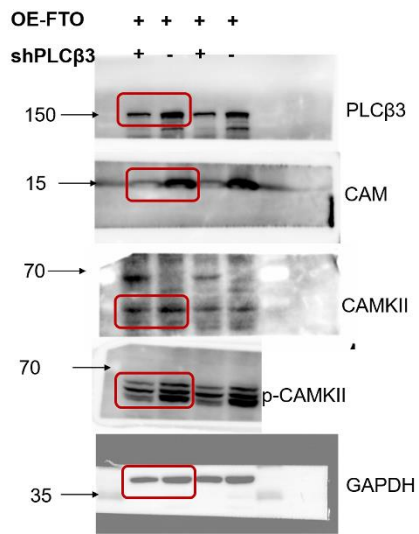

Figure 6c

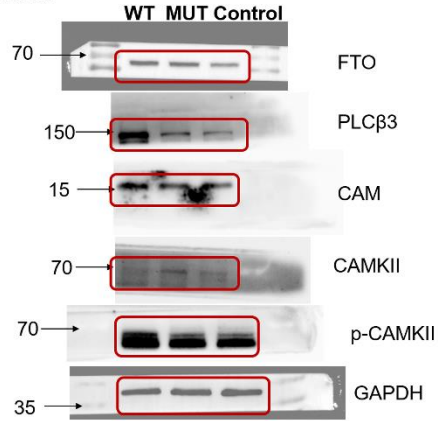

Supplementary Figure 3b

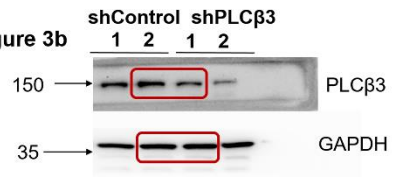

56

Figure 7 n

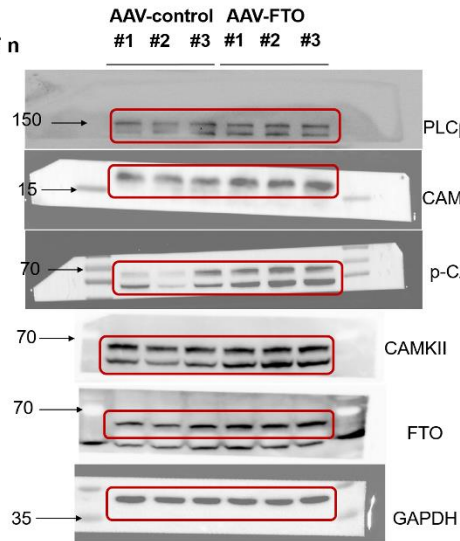

Figure 7 p

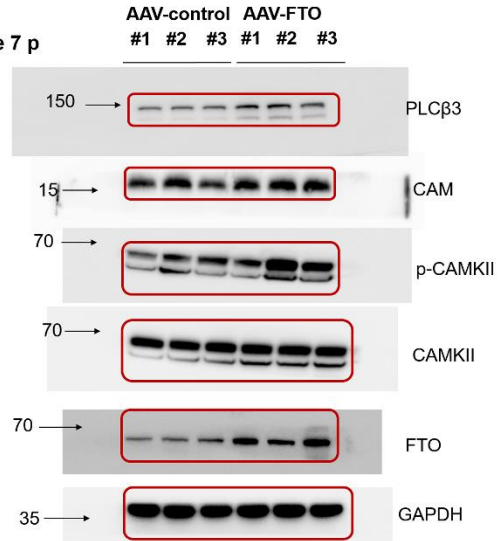

57

58 **Supplementary Fig. 5 Unedited and uncropped Western blots of all the**

59 **indicated figures in main figures and supplementary figures.**

60
