# Supplementary material for: FTO-mediated m6A demethylation regulates GnRH expression in the hypothalamus via the PLCβ3/Ca2+/CAMK signalling pathway
Source: PubMed Central journal article supplement (PMC10739951; doi:10.1038/s42003-023-05677-2), 2023-12-21
Supplement: 42003_2023_5677_MOESM2_ESM.pdf [file 42003_2023_5677_MOESM2_ESM.pdf]

## **Description of Additional Supplementary Files**

**File name:** Supplementary Data

**Description:** The source data behind the graphs in the paper.
